# Supplementary material for: Simultaneous cancer control and diagnosis with magnetic nanohybrid materials
Source: publisher site journal article supplement (doi:10.3762/bjnano.7.14), 2016-01-27
Supplement: Additional file 1 [file 2190-4286-7-14-S1.pdf]

## **Supporting Information**

for

### **Simultaneous cancer control and diagnosis with magnetic nanohybrid materials**

Reza Saadat<sup>\*1</sup> and Franz Renz<sup>1</sup>

Address: <sup>1</sup>Institute for Inorganic Chemistry, Leibniz University Hannover, Callinstr. 3–9, 30169  
Hannover, Germany

Email: Reza Saadat\* - rezasaadat.chem-uni.hannover@mail.de

\* Corresponding author

### **Additional experimental data**

#### **Table of contents**

|                            |   |
|----------------------------|---|
| 1. General information     | 2 |
| 2. Experimental procedures | 2 |
| 3. Spectra                 | 5 |

## **1. General information**

All commercially available reagents and solvents were deployed as received from Sigma Adrich Corporation without further purification and without drying. FTIR spectra were performed as KBr pellets with a Bruker Tensor 27 spectrometer. TG-DTA measurements were obtained with a STA 409 from Netzsch with a gas flow of 80% N<sub>2</sub> and 20% O<sub>2</sub>. DLS and zeta potential measurements were performed with a Zetasizer 6.01 from Malvern Instruments at pH 7 in water. XRD measurements were obtained with a Stoe StadiP PSD with Cu K $\alpha$  radiation.

## **2. Experimental procedures**

### **Synthesis of magnetite nanoparticles**

FeCl<sub>2</sub>·4H<sub>2</sub>O (5 g, 25.1 mmol) and FeCl<sub>3</sub>·6 H<sub>2</sub>O (13.6 g, 50.3 mmol) were solved in 60 mL distilled water. The solution was stirred 20 min after adding 10 mL of an NH<sub>3</sub> solution (25%) at 25 °C. The resulted black deposit was filtered, washed three times with water and dried under vacuum. The yield was 5.46 g.

### **Silanization of magnetite nanoparticles**

5 g of the magnetite nanoparticles were dispersed in 400 mL Ethanol in an ultrasonic bath. Subsequently, 120 mL of an NH<sub>3</sub> solution (25%), 2.33 mL TEOS (10.5 mmol) and 80 mL distilled water was slowly added within 2 h at 25 °C. The resulted black-brown deposit was separated with a hand-held neodymium magnet, washed twice with ethanol and dried under vacuum. The yield was 5.15 g.

### **Aminofunctionalisation of silanized magnetite nanoparticles**

3.5 g of silanized nanoparticles were dispersed with an ultrasonic bath in 500 mL ethanol. Afterwards 15 mL (3-aminopropyle)triethoxysilane (60 mmol) was added and treated with ultrasound for 12 h at 25 °C. The resulted brown deposit was separated with a hand-held neodymium magnet, washed twice with ethanol and dried under vacuum. The yield was 3.37 g.

### **Conjunction of the aminofunctionalized nanoparticles with Cl-bzimpy**

0.03 g of aminofunctionalized nanoparticles were dispersed with an ultrasonic bath in 20 mL ethanol. Subsequently 0.06 g Cl-bzimpy (bzimpy = 2,6-bis(benzimidazol-2-yl)-pyridine, 0.2 mmol) was added and treated with ultrasound for 4 h at 25 °C. The resulted bright-brown deposit was separated with a hand-held neodymium magnet, washed twice with ethanol and dried under vacuum. The yield was 0.029 g.

### **Conjunction of the nanoparticles to each other**

0.02 g of Cl-bzimpy nanoparticles were dispersed with an ultrasonic bath in 40 mL ethanol. 0.27 g  $\text{FeCl}_2 \cdot 4\text{H}_2\text{O}$  (1 mmol) and 0.1 g ascorbic acid were added to this dispersion and treated with ultrasound for 2 h at 25 °C. The resulted brown deposit was separated with a hand-held neodymium magnet, washed twice with ethanol and dried under vacuum. The yield was 0.025 g.

### **Conjunction of Ga-DOTA with the aminofunctionalized nanoparticles**

0.15 g of aminofunctionalized nanoparticles were dispersed with an ultrasonic bath in 300 mL DMF. Subsequently, 0.39 g DCC (0.19 mmol), 0.18 g 4-DMAP (1.5 mmol) and 0.1 g Ga-DOTA (0.2 mmol) was added and treated with ultrasound for 24 h at 80 °C. The resulted bright-brown deposit was separated with a hand-held neodymium magnet, washed twice with DMF and dried under vacuum. The yield was 0.152 g.

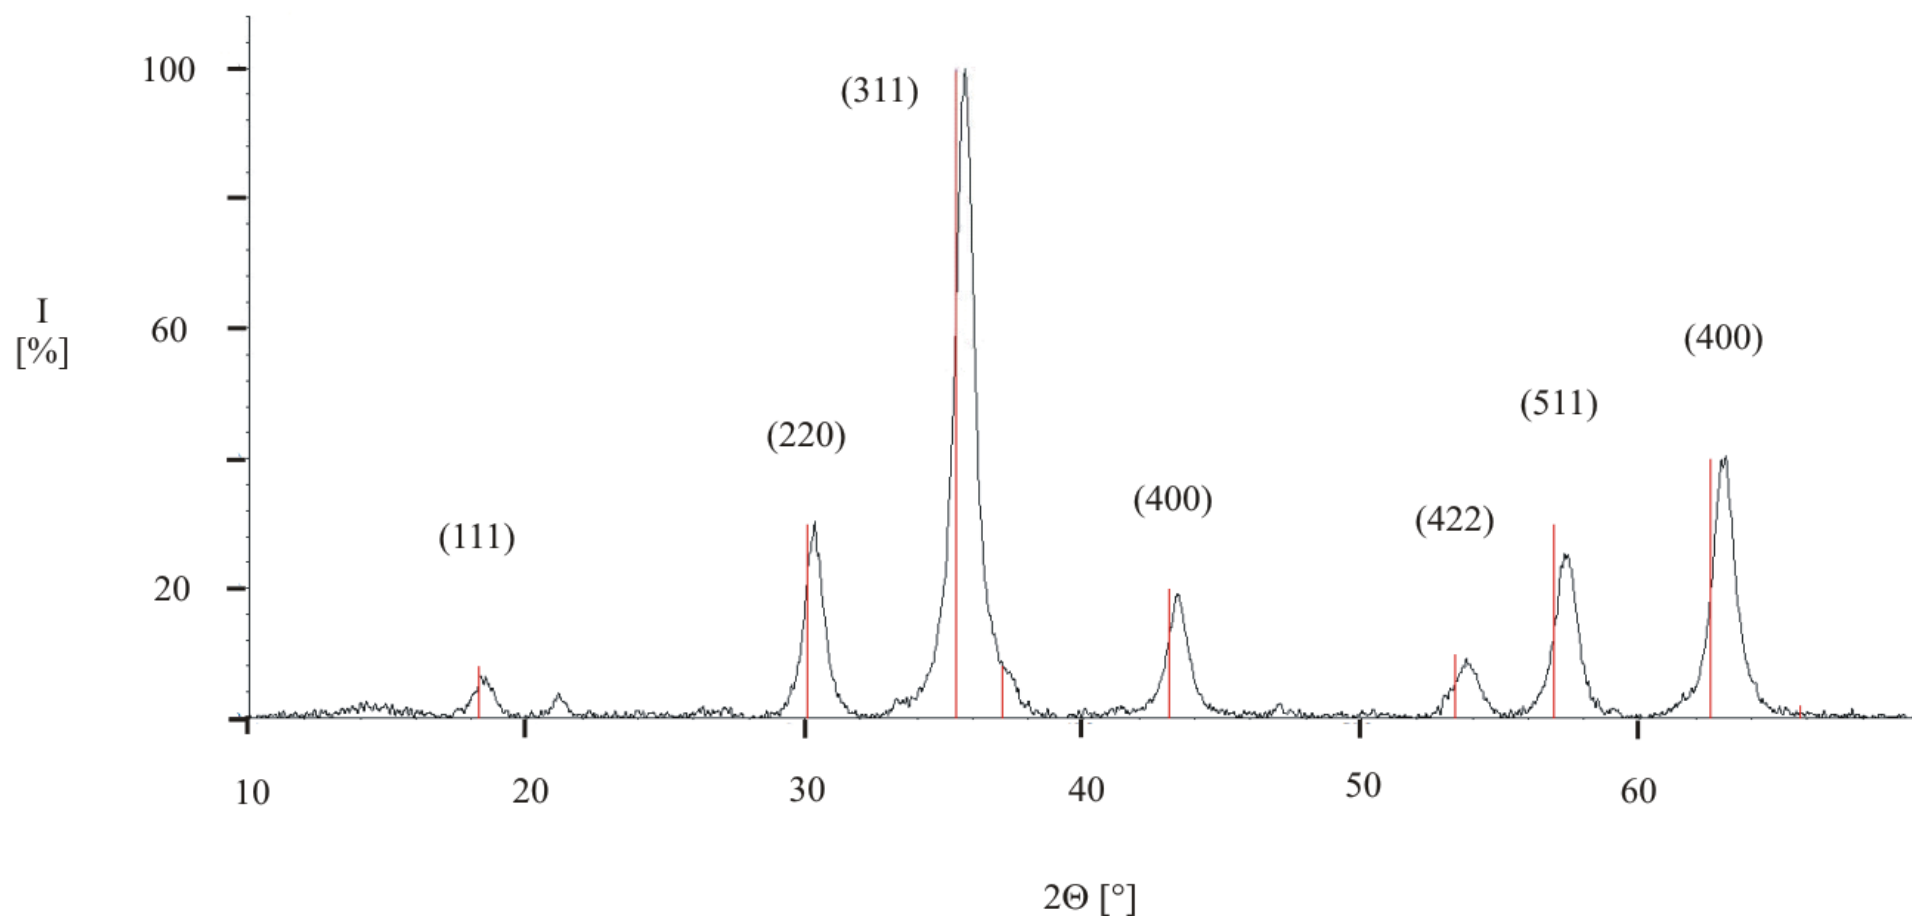

**Figure S1:** XRD of  $\text{Fe}_3\text{O}_4$

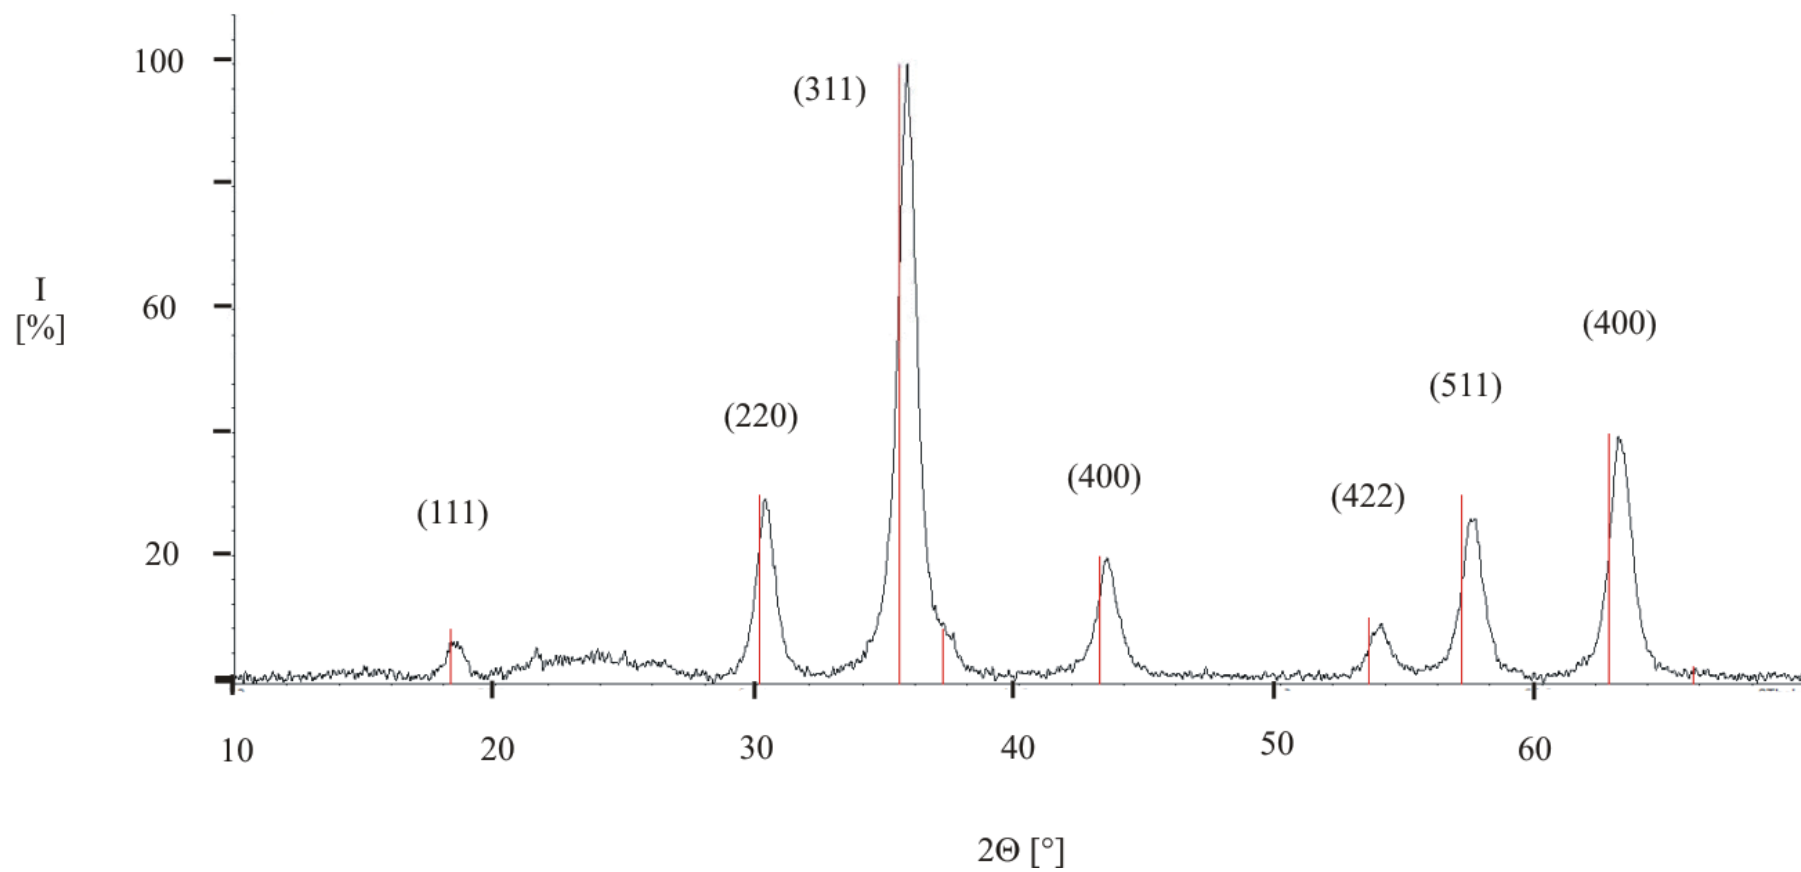

**Figure S2:** XRD of  $\text{Fe}_3\text{O}_4@\text{SiO}_2$

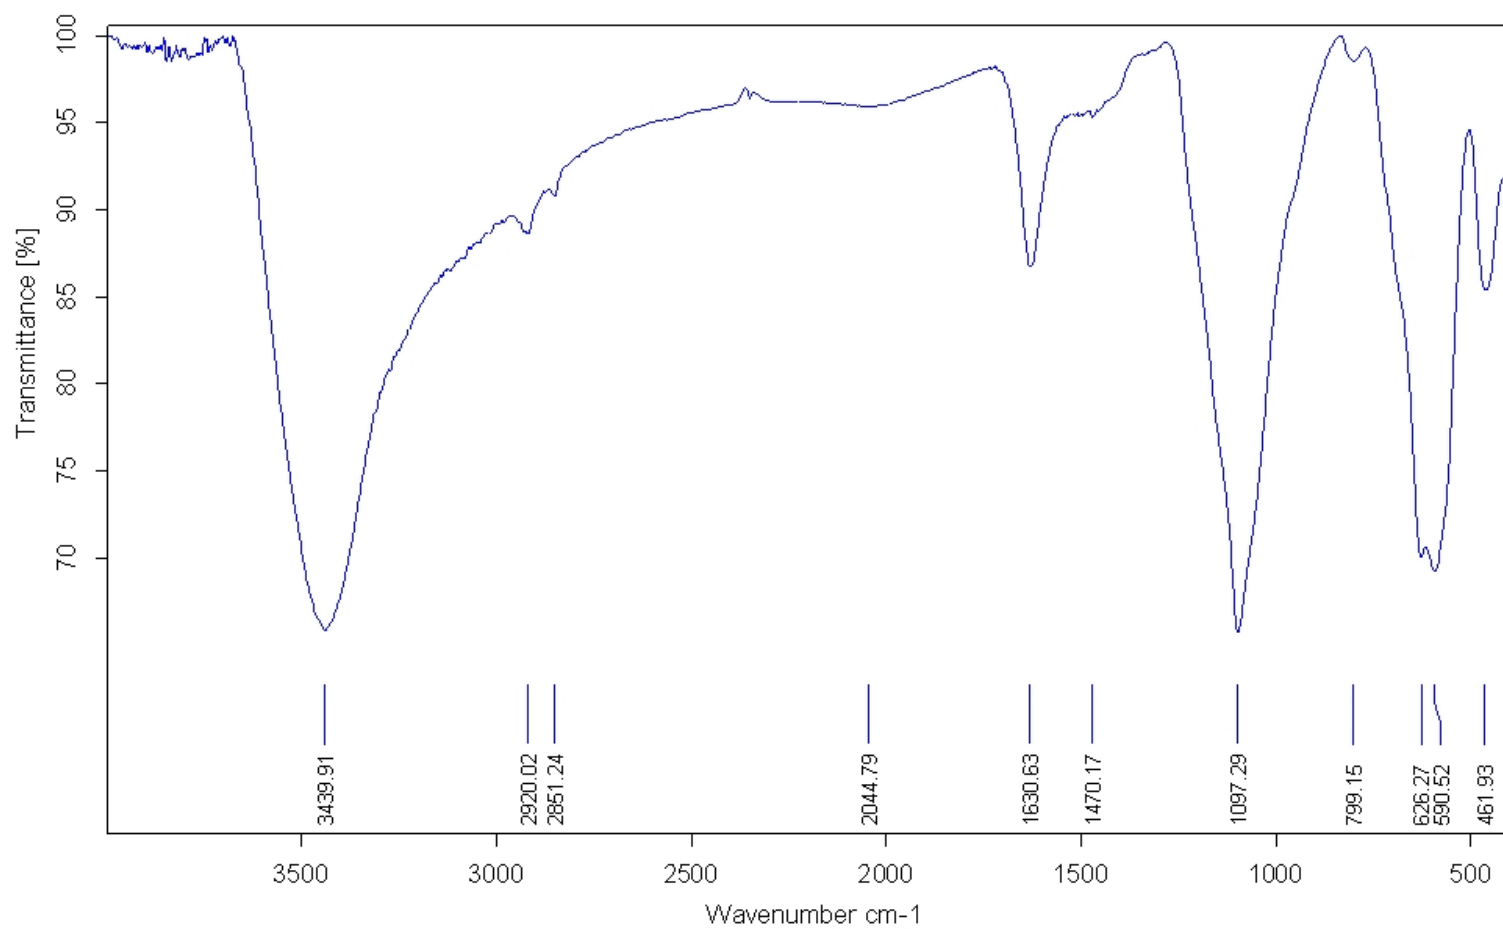

**Figure S3:** IR spectrum of aminofunctionalized  $\text{Fe}_3\text{O}_4@\text{SiO}_2$ .

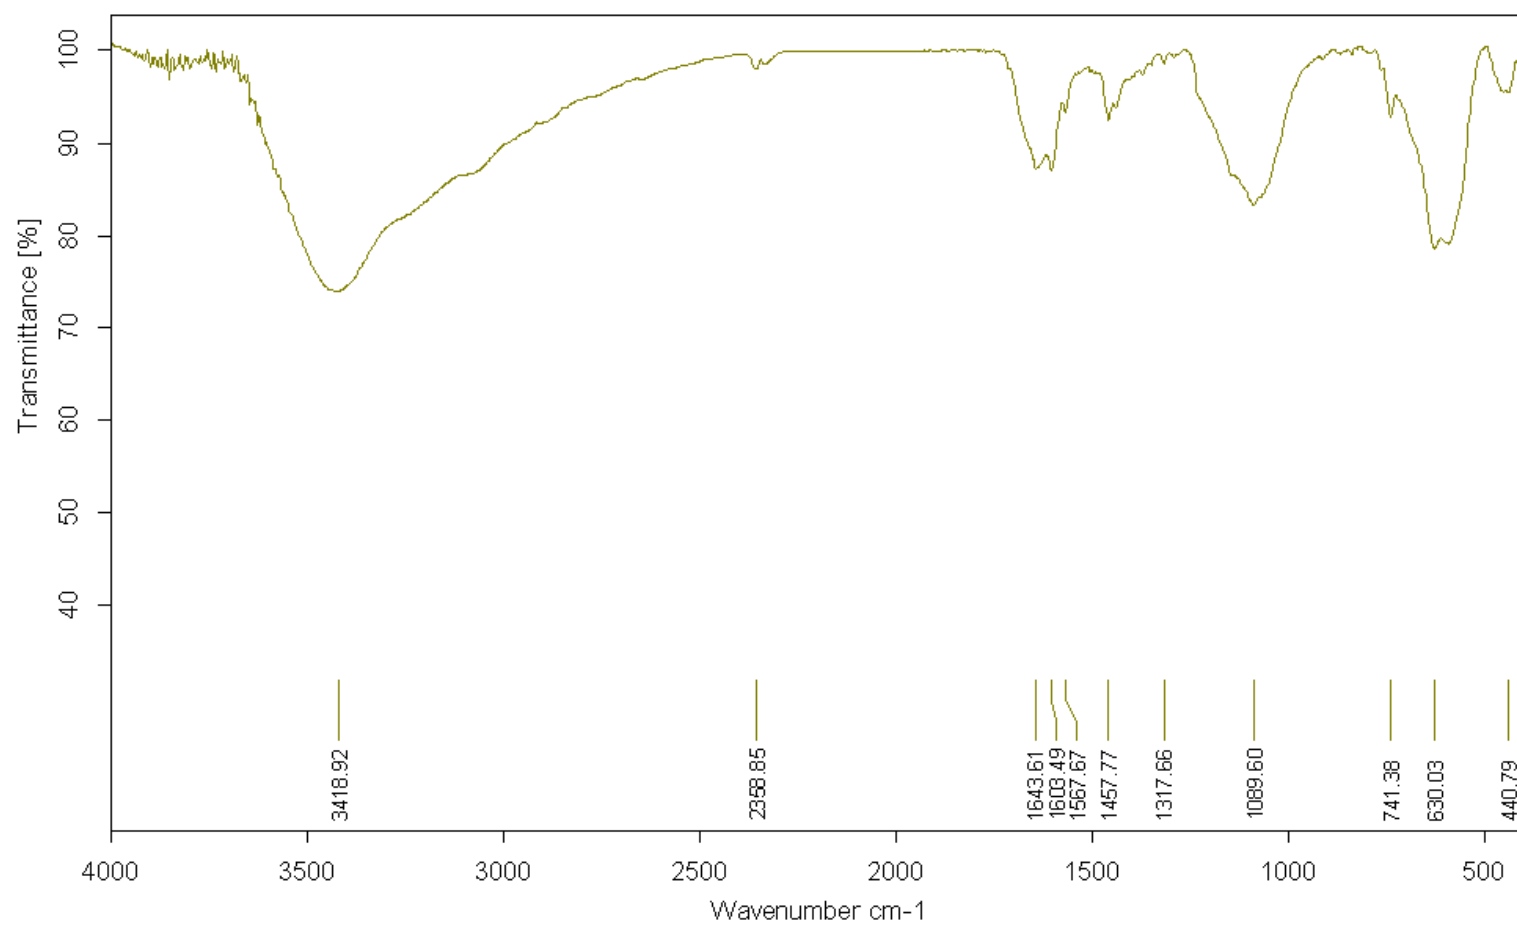

**Figure S4:** IR spectrum of Fe<sub>3</sub>O<sub>4</sub>-bzimpy.



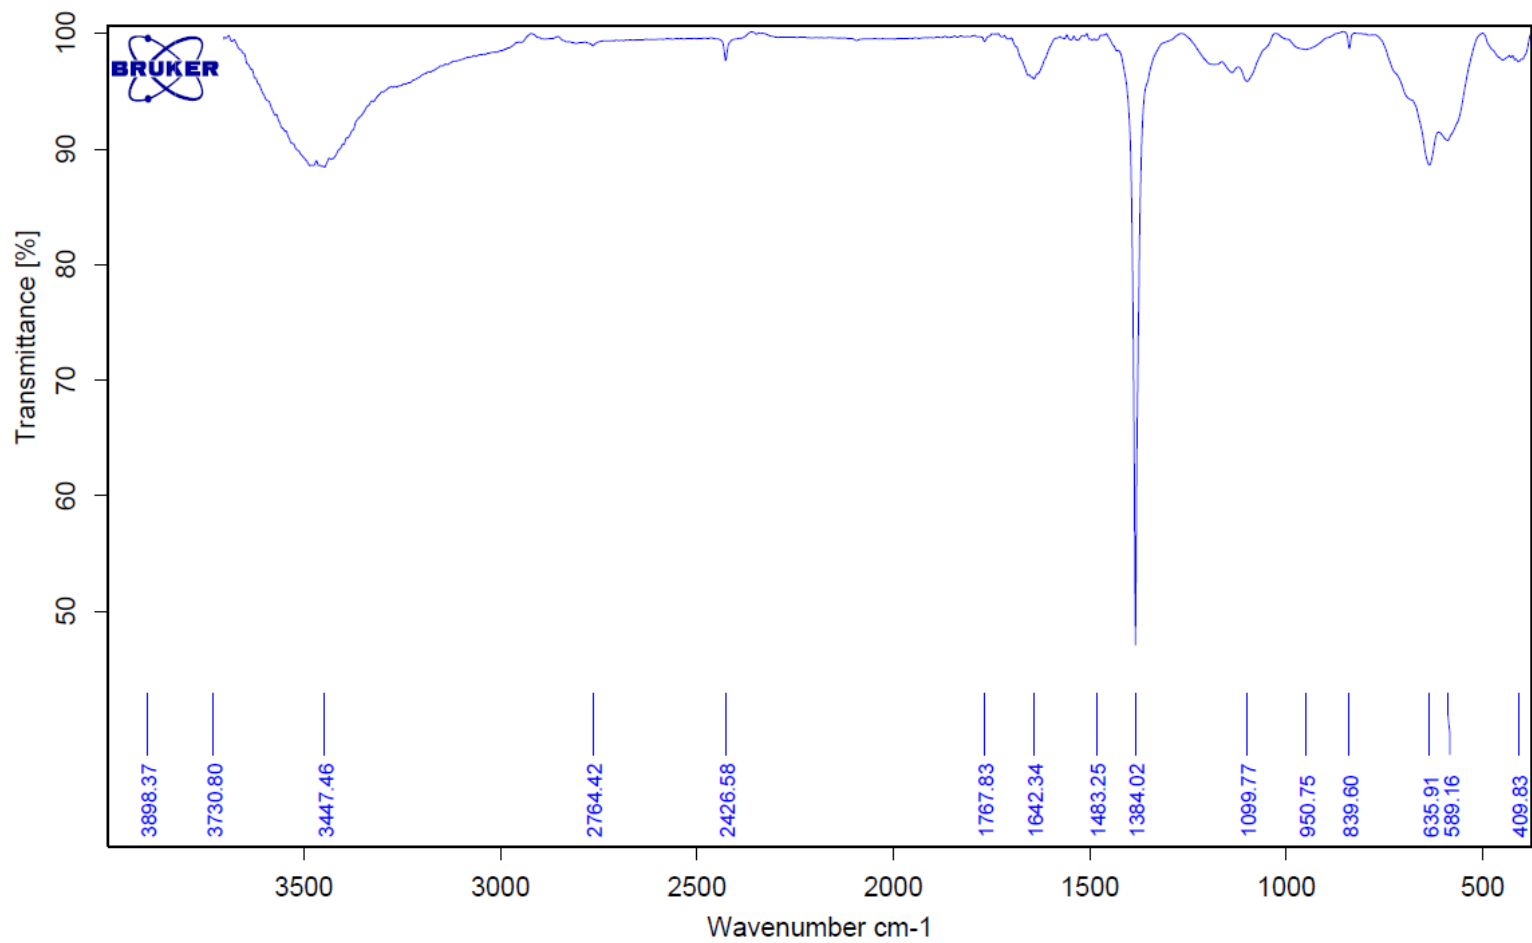

**Figure S5:** IR spectrum of Fe<sub>3</sub>O<sub>4</sub>-DOTA
